# Supplementary material for: SERS-Based Liquid Biopsy of Gastrointestinal Tumors Using a Portable Raman Device Operating in a Clinical Environment
Source: PubMed Central journal article supplement (PMC7019591; doi:10.3390/jcm9010212), 2020-01-13
Supplement: jcm-09-00212-s001.pdf [file jcm-09-00212-s001.pdf]

# Supplementary

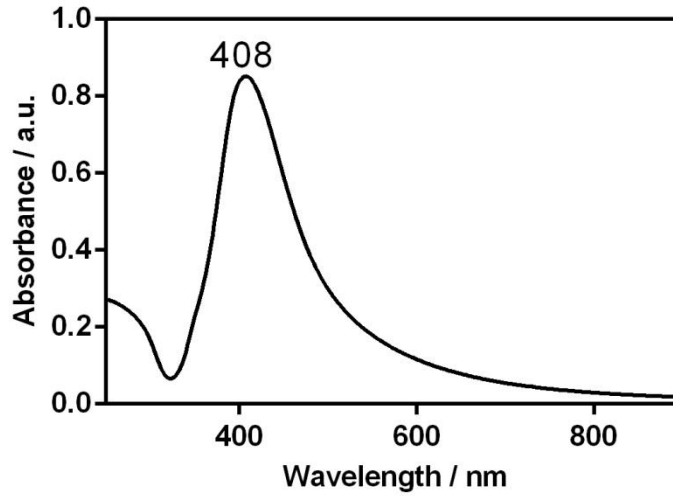

Figure S1. The UV-Vis absorbance spectrum of hya-AgNPs.

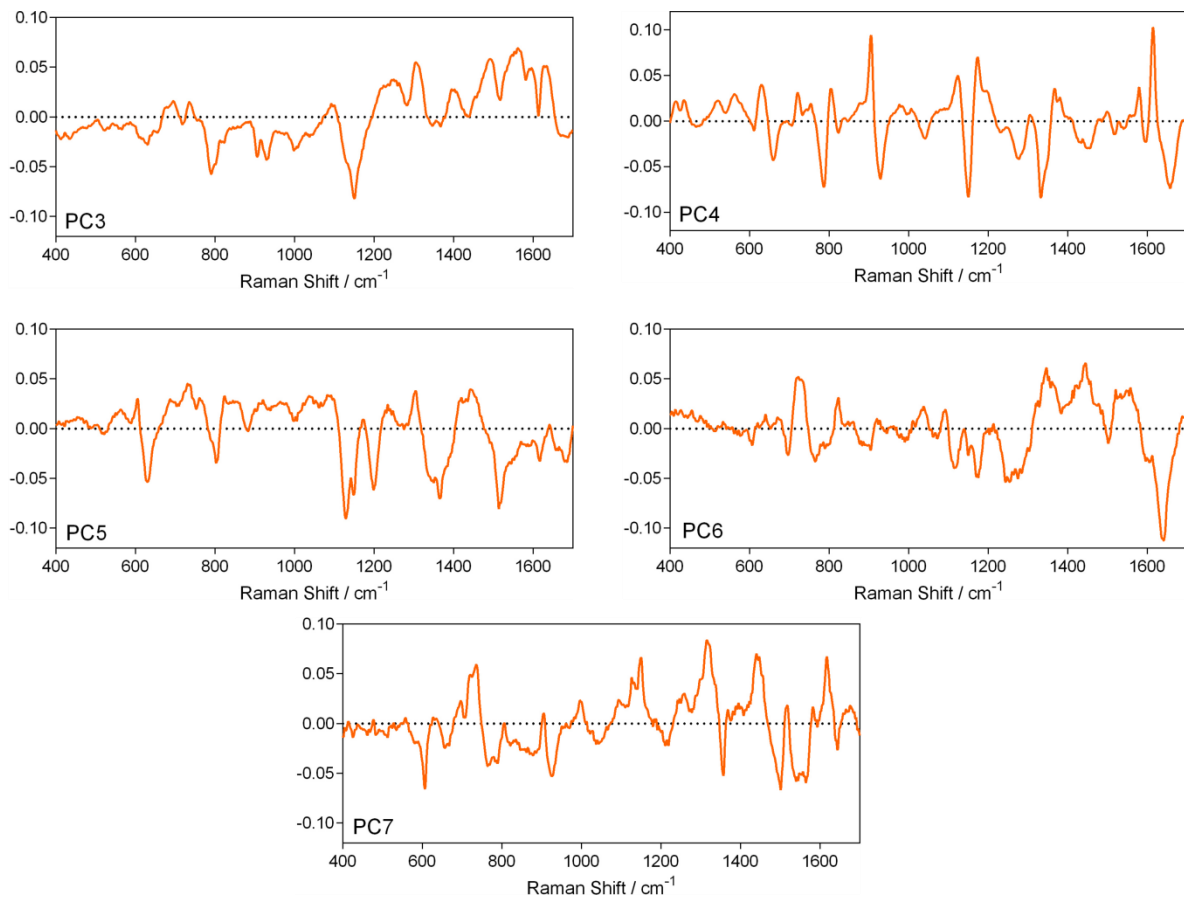

Figure S2. The loading plots corresponding to PCs 3–7, which resulted from the PCA analysis of the SERS spectra of serum samples of  $n = 53$  patients with gastrointestinal tumors and of  $n = 25$  Ctrl subjects (the loading plots of PC 1 and PC 2 are shown in Figure 3).

**Table S1.** The demographic and clinical information of patients and controls.

| Sample    | Sex | Age | Type of Tumor  | Group<br>(0 = Ctrl, 1 = colorectal<br>cancer, 2 = gastric cancer) | Grade<br>(0 = Ctrl, 1 = early,<br>2 = advanced) | Height (cm) | Weight (kg) | BMI   |
|-----------|-----|-----|----------------|-------------------------------------------------------------------|-------------------------------------------------|-------------|-------------|-------|
| Ctrl 1    | M   | 56  |                |                                                                   | 0                                               | 178         | 76          | 23.98 |
| Ctrl 2    | F   | 28  |                |                                                                   | 0                                               | 176         | 60          | 19.36 |
| Ctrl 3    | F   | 46  |                |                                                                   | 0                                               | 268         | 88          | 32.27 |
| Ctrl 4    | M   | 30  |                |                                                                   | 0                                               | 275         | 64          | 20.89 |
| Ctrl 5    | M   | 30  |                |                                                                   | 0                                               | 270         | 65          | 22.49 |
| Ctrl 6    | F   | 30  |                |                                                                   | 0                                               | 263         | 52          | 29.57 |
| Ctrl 7    | F   | 64  |                |                                                                   | 0                                               | 263         | 77          | 28.98 |
| Ctrl 8    | F   | 46  |                |                                                                   | 0                                               | 260         | 67          | 26.27 |
| Ctrl 9    | F   | 30  |                |                                                                   | 0                                               | 263         | 65          | 24.46 |
| Ctrl 10   | F   | 32  |                |                                                                   | 0                                               | 278         | 65          | 20.5  |
| Ctrl 11   | M   | 30  |                |                                                                   | 0                                               | 274         | 69          | 22.79 |
| Ctrl 12   | F   | 30  |                |                                                                   | 0                                               | 266         | 60          | 25.78 |
| Ctrl 13   | M   | 30  |                |                                                                   | 0                                               | 275         | 230         | 42.44 |
| Ctrl 14   | F   | 45  |                |                                                                   | 0                                               | 256         | 45          | 28.49 |
| Ctrl 15   | F   | 35  |                |                                                                   | 0                                               | 258         | 65          | 26.03 |
| Ctrl 16   | M   | 38  |                |                                                                   | 0                                               | 282         | 90          | 27.27 |
| Ctrl 17   | F   | 44  |                |                                                                   | 0                                               | 262         | 55          | 20.95 |
| Ctrl 18   | F   | 30  |                |                                                                   | 0                                               | 273         | 62          | 20.72 |
| Ctrl 19   | F   | 30  |                |                                                                   | 0                                               | 260         | 54          | 22.09 |
| Ctrl 20   | F   | 35  |                |                                                                   | 0                                               | 262         | 64          | 24.69 |
| Ctrl 21   | F   | 35  |                |                                                                   | 0                                               | 272         | 68          | 22.98 |
| Ctrl 22   | F   | 30  |                |                                                                   | 0                                               | 265         | 50          | 28.36 |
| Ctrl 23   | M   | 30  |                |                                                                   | 0                                               | 276         | 72          | 23.24 |
| Ctrl 24   | M   | 35  |                |                                                                   | 0                                               | 272         | 70          | 23.66 |
| Ctrl 25   | M   | 30  |                |                                                                   | 0                                               | 270         | 64          | 22.24 |
| Patient 1 | F   | 83  | rectal cancer  | 1                                                                 | 1                                               | 265         | 60          | 22.03 |
| Patient 2 | F   | 84  | gastric cancer | 2                                                                 | 1                                               | 268         | 56          | 29.84 |

|            |   |    |                        |   |   |     |    |       |
|------------|---|----|------------------------|---|---|-----|----|-------|
| Patient 3  | M | 67 | sigmoid cancer         | 1 | 2 | 275 | 68 | 22.2  |
| Patient 4  | F | 69 | colon cancer           | 1 | 2 | 265 | 60 | 22.03 |
| Patient 5  | M | 72 | gastric cancer         | 2 | 2 | 268 | 70 | 24.8  |
| Patient 6  | F | 66 | rectal cancer          | 1 | 2 | 265 | 55 | 20.2  |
| Patient 7  | F | 73 | gastric cancer         | 2 | 2 | 272 | 62 | 20.62 |
| Patient 8  | M | 43 | gastric cancer         | 2 | 2 | 270 | 80 | 27.68 |
| Patient 9  | F | 40 | sigma cancer           | 1 | 1 | 263 | 62 | 22.33 |
| Patient 10 | F | 55 | sigma cancer           | 1 | 2 | 270 | 80 | 27.68 |
| Patient 11 | M | 77 | gastric cancer         | 2 | 2 | 275 | 60 | 29.59 |
| Patient 12 | M | 57 | rectal cancer          | 1 | 2 | 278 | 90 | 28.4  |
| Patient 13 | F | 75 | colon cancer           | 1 | 1 | 266 | 70 | 25.4  |
| Patient 14 | M | 76 | rectosigmoid cancer    | 1 | 2 | 278 | 70 | 22.09 |
| Patient 15 | F | 39 | small intestine cancer | 1 | 2 | 250 | 56 | 24.88 |
| Patient 16 | F | 77 | sigmoid cancer         | 1 | 2 | 268 | 57 | 20.29 |
| Patient 17 | M | 75 | gastric cancer         | 2 | 2 | 278 | 68 | 22.46 |
| Patient 18 | F | 66 | colon cancer           | 1 | 1 | 278 | 60 | 28.93 |
| Patient 19 | F | 60 | sigmoid cancer         | 1 | 1 | 275 | 70 | 22.85 |
| Patient 20 | M | 57 | gastric cancer         | 2 | 2 | 280 | 94 | 29.02 |
| Patient 21 | M | 63 | colon cancer           | 1 | 1 | 268 | 90 | 32.88 |
| Patient 22 | M | 69 | rectosigmoid cancer    | 1 | 2 | 282 | 80 | 24.25 |
| Patient 23 | M | 60 | gastric cancer         | 2 | 2 | 270 | 65 | 22.49 |
| Patient 24 | M | 59 | small intestine cancer | 1 | 2 | 275 | 84 | 27.42 |
| Patient 25 | F | 61 | sigmoid cancer         | 1 | 1 | 247 | 58 | 26.84 |
| Patient 26 | M | 73 | gastric cancer         | 2 | 1 | 270 | 55 | 29.03 |
| Patient 27 | M | 73 | rectum cancer          | 1 | 2 | 268 | 60 | 22.25 |
| Patient 28 | F | 52 | sigmoid cancer         | 1 | 2 | 270 | 90 | 32.24 |
| Patient 29 | M | 61 | gastric cancer         | 2 | 2 | 278 | 69 | 22.77 |
| Patient 30 | M | 66 | sigmoid cancer         | 1 | 1 | 272 | 83 | 28.05 |
| Patient 31 | M | 65 | colon cancer           | 1 | 2 | 268 | 58 | 20.54 |
| Patient 32 | M | 76 | gastric cancer         | 2 | 1 | 269 | 80 | 28.72 |
| Patient 33 | F | 81 | gastric cancer         | 2 | 2 | 252 | 55 | 23.8  |
| Patient 34 | M | 68 | sigmoid cancer         | 1 | 2 | 284 | 80 | 23.62 |

|            |   |    |                     |   |   |     |     |       |
|------------|---|----|---------------------|---|---|-----|-----|-------|
| Patient 35 | M | 57 | gastric cancer      | 2 | 1 | 280 | 68  | 20.98 |
| Patient 36 | M | 68 | sigmoid cancer      | 1 | 1 | 262 | 200 | 38.2  |
| Patient 37 | F | 68 | colon gastric       | 1 | 2 | 264 | 200 | 37.28 |
| Patient 38 | F | 61 | rectal cancer       | 1 | 1 | 258 | 63  | 25.23 |
| Patient 39 | F | 40 | gastric cancer      | 2 | 1 | 268 | 65  | 23.03 |
| Patient 40 | F | 61 | colon cancer        | 1 | 2 | 268 | 90  | 32.88 |
| Patient 41 | F | 67 | esophagus cancer    | 2 | 2 | 276 | 60  | 29.36 |
| Patient 42 | M | 52 | esophagus cancer    | 2 | 2 | 268 | 60  | 22.63 |
| Patient 43 | M | 59 | rectosigmoid cancer | 1 | 1 | 270 | 70  | 24.22 |
| Patient 44 | M | 61 | colon cancer        | 1 | 1 | 270 | 90  | 32.24 |
| Patient 45 | M | 65 | rectal cancer       | 1 | 1 | 280 | 225 | 35.49 |
| Patient 46 | F | 66 | rectal cancer       | 1 | 1 | 275 | 70  | 22.85 |
| Patient 47 | F | 72 | gastric cancer      | 2 | 2 | 260 | 96  | 37.5  |
| Patient 48 | M | 82 | rectal cancer       | 1 | 2 | 269 | 69  | 24.25 |
| Patient 49 | F | 81 | gastric cancer      | 2 | 1 | 260 | 60  | 23.43 |
| Patient 50 | M | 62 | rectal cancer       | 1 | 1 | 270 | 80  | 27.68 |
| Patient 51 | F | 68 | rectal cancer       | 1 | 2 | 268 | 70  | 24.8  |
| Patient 52 | M | 55 | rectal cancer       | 1 | 2 | 275 | 68  | 22.2  |
| Patient 53 | M | 63 | rectal cancer       | 1 | 2 | 275 | 205 | 34.28 |

**Table S2.** The results of Levene’s test for the first seven PCs and the inflammatory markers. *P*-value < 0.05 shows significant difference between the control and GCRC groups.

| Parameter        | <i>P</i> -value |
|------------------|-----------------|
| PC1              | <0.001          |
| PC2              | 0.113           |
| PC3              | 0.552           |
| PC4              | 0.436           |
| PC5              | 0.148           |
| PC6              | 0.386           |
| PC7              | 0.847           |
| CRP              | <0.001          |
| Neutrophil Count | 0.001           |
| Platelet Count   | 0.013           |
| Hemoglobin       | 0.001           |

**Table S3.** The descriptive statistics for the first seven PCs and for the inflammatory markers for the two groups, Ctrl and GCRC.

| Parameter        | Group | Mean   | Standard Deviation | Variance |
|------------------|-------|--------|--------------------|----------|
| PC1              | Ctrl  | 2.264  | 3.747              | 14.038   |
|                  | GCRC  | -1.068 | 7.278              | 52.963   |
| PC2              | Ctrl  | -1.154 | 2.954              | 8.726    |
|                  | GCRC  | 0.544  | 4.516              | 20.396   |
| PC3              | Ctrl  | -1.095 | 2.746              | 7.543    |
|                  | GCRC  | 0.519  | 3.261              | 10.635   |
| PC4              | Ctrl  | 0.279  | 2.663              | 7.093    |
|                  | GCRC  | -0.131 | 3.177              | 10.093   |
| PC5              | Ctrl  | 0.797  | 1.615              | 2.609    |
|                  | GCRC  | -0.376 | 2.379              | 5.626    |
| PC6              | Ctrl  | -0.377 | 1.049              | 1.100    |
|                  | GCRC  | 0.178  | 1.433              | 2.054    |
| PC7              | Ctrl  | -0.339 | 1.205              | 1.453    |
|                  | GCRC  | 0.160  | 1.130              | 1.278    |
| CPR              | Ctrl  | -0.021 | 0.087              | 0.008    |
|                  | GCRC  | 0.152  | 0.347              | 0.120    |
| Neutrophil Count | Ctrl  | -0.042 | 0.007              | 0.003    |
|                  | GCRC  | 0.078  | 0.210              | 0.044    |
| Platelet Count   | Ctrl  | -0.011 | 0.062              | 0.004    |
|                  | GCRC  | 0.032  | 0.172              | 0.029    |
| Hemoglobin Level | Ctrl  | 0.024  | 0.112              | 0.012    |
|                  | GCRC  | -0.059 | 0.239              | 0.057    |

**Table S4.** The results of the univariate data analysis for the CRP level, neutrophil count, platelet count and hemoglobin level.

|                             | AUC  |                       | Ctrl<br>Subjects | GCRC Patients |
|-----------------------------|------|-----------------------|------------------|---------------|
| C-Reactive Protein<br>Level | 0.59 | Average               | 1.13             | 2.08          |
|                             |      | Standard<br>deviation | 0.47             | 1.89          |
|                             |      | Median                | 1.00             | 1.43          |
| Neutrophil Count            | 0.69 | Average               | 3.86             | 5.44          |
|                             |      | Standard<br>deviation | 0.74             | 2.74          |
|                             |      | Median                | 3.99             | 4.79          |
| Platelet Count              | 0.52 | Average               | 280.6            | 312.7         |
|                             |      | Standard<br>deviation | 46.25            | 126.4         |
|                             |      | Median                | 289.0            | 277.0         |
| Hemoglobin Level            | 0.58 | Average               | 13.19            | 12.53         |
|                             |      | Standard<br>deviation | 0.88             | 1.89          |
|                             |      | Median                | 13.30            | 12.70         |
